# Supplementary material
Source: HighWire-hosted journal article supplement (https://www.ajnr.org/highwire/filestream/79572/field_highwire_adjunct_files/0/20-00888.pdf)
Supplement: 20-00888.pdf [file 20-00888.pdf]

**On-line Table: Clinical outcome at discharge and at 6 months**

| mRS (No.) (%) | At Discharge | At 6 Months |
|---------------|--------------|-------------|
| 0             | 11 (36.7)    | 14 (46.7)   |
| 1             | 7 (23.3)     | 5 (16.7)    |
| 2             | 2 (6.7)      | 4 (13.3)    |
| 3             | 3 (10)       | 3 (10.0)    |
| 4             | 2 (6.7)      | 0 (0)       |
| 5             | 1 (3.3)      | 0 (0)       |
| 6             | 4 (13.3)     | 4 (13.3)    |
